# Supplementary material for: Modulating charge transfer dynamics for g-C3N4 through a dimension and interface engineered transition metal phosphide co-catalyst for efficient visible-light photocatalytic hydrogen generation
Source: Royal Society of Chemistry journal article supplement (doi:10.1039/c9ta00765b), 2019-01-01
Supplement: c9ta00765b1.pdf [file c9ta00765b1.pdf]

Electronic Supporting Information for

**Modulating Charge Transfer Dynamics for  $g\text{-C}_3\text{N}_4$  through Dimension and Interface Engineered Transition Metal Phosphide co-catalyst for Efficient Visible-Light Photocatalytic Hydrogen Generation**

Fu Zhang,<sup>a</sup> Jihua Zhang,<sup>b</sup> Jianmin Li,<sup>c</sup> Xu Jin,<sup>c</sup> Yapeng Li,<sup>a</sup> Min Wu,<sup>d</sup> Xiongwu Kang,<sup>d</sup> Tao Hu,<sup>e</sup> Xiaoqi Wang,<sup>c</sup> Wei Ren<sup>e</sup> and Genqiang Zhang\*<sup>a</sup>

<sup>a</sup> Division of Nanomaterials & Chemistry, Hefei National Research Center for Physical Sciences at the Microscale, Department of Materials Science and Engineering, University of Science and Technology of China, Hefei 230026, China

<sup>b</sup> Guizhou Provincial Key Laboratory of Computational Nano-Material Science, Guizhou Education University, Guiyang 550018, China

<sup>c</sup> Research Institute of Petroleum Exploration & Development (RIPED), PetroChina, No. 20 Xueyuan Road, Haidian District, Beijing, 100083, P. R. China

<sup>d</sup> New Energy Research Institute, College of Environment and Energy, South China University of Technology, Guangzhou Higher Education Mega Centre, Guangzhou 510006, China

<sup>e</sup> International Centre for Quantum and Molecular Structures, Physics Department, Shanghai University, Shanghai 200444, China

Corresponding Author:

G. Q. Zhang, E-mail: [gqzhangmse@ustc.edu.cn](mailto:gqzhangmse@ustc.edu.cn)

Figures

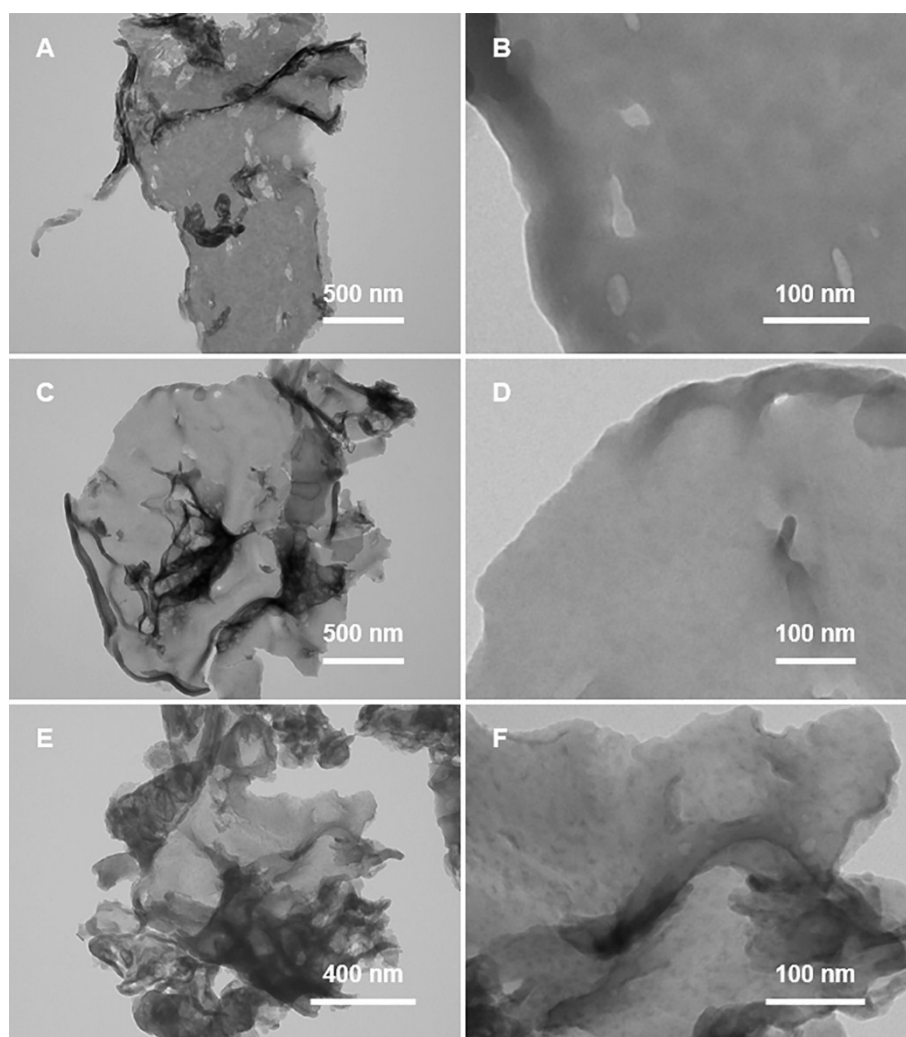

**Fig. S1** Low-magnification and high-magnification TEM images of (A, B) pure  $g\text{-C}_3\text{N}_4$ , (C, D) Co-glycolate/ $g\text{-C}_3\text{N}_4$  composites and (E, F) the 2.5CP/CN sample.

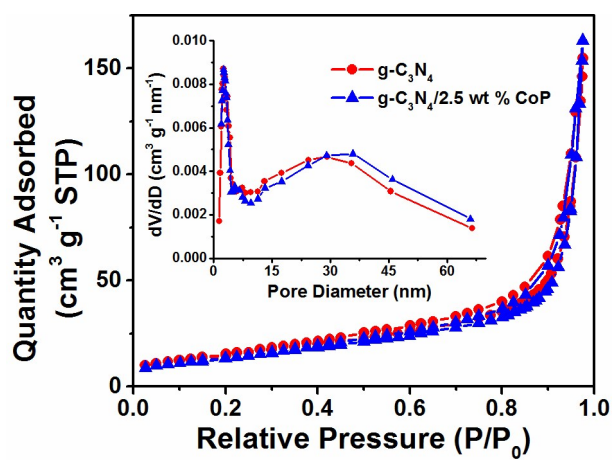

**Fig. S2** Nitrogen adsorption-desorption isotherms and the corresponding pore size distribution curves (inset) of  $g\text{-C}_3\text{N}_4$  and 2.5CP/CN samples.

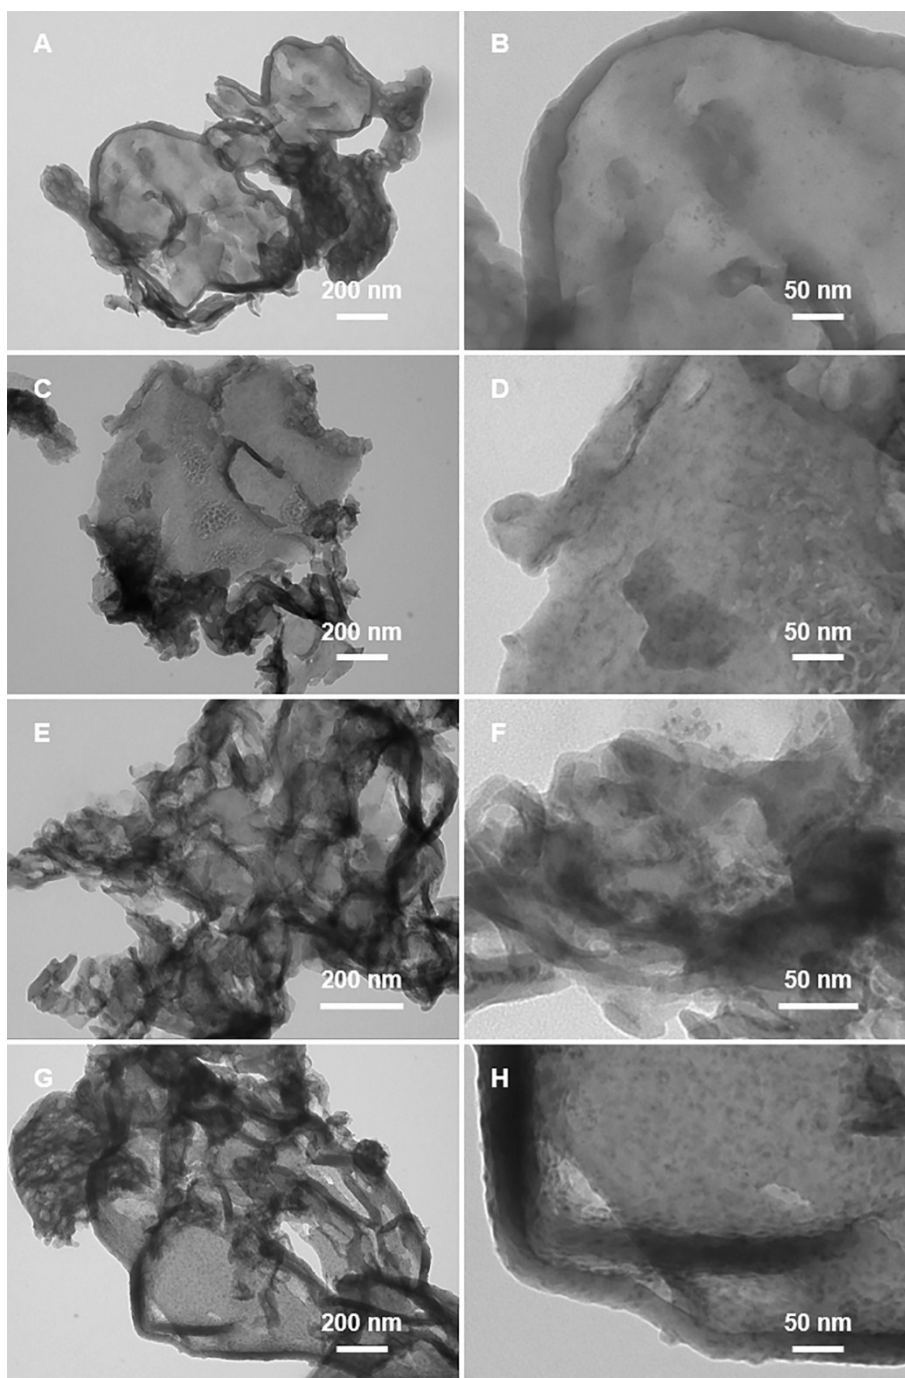

**Fig. S3** Low-magnification and high-magnification TEM images of (A, B) 1.25CP/CN, (C, D) 5CP/CN, (E, F) 7.5CP/CN and (G, H) 10CP/CN.

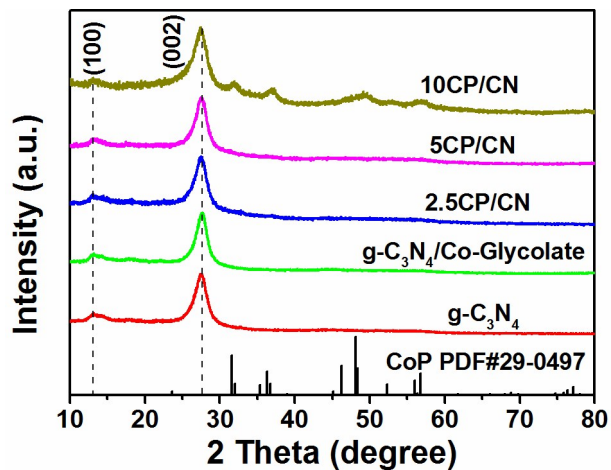

**Fig. S4** XRD patterns of the pure  $g\text{-C}_3\text{N}_4$ , Co-Glycolate/ $g\text{-C}_3\text{N}_4$ , CoP/ $g\text{-C}_3\text{N}_4$  composites with variable CoP mass contents (2.5, 5, 10 wt%).

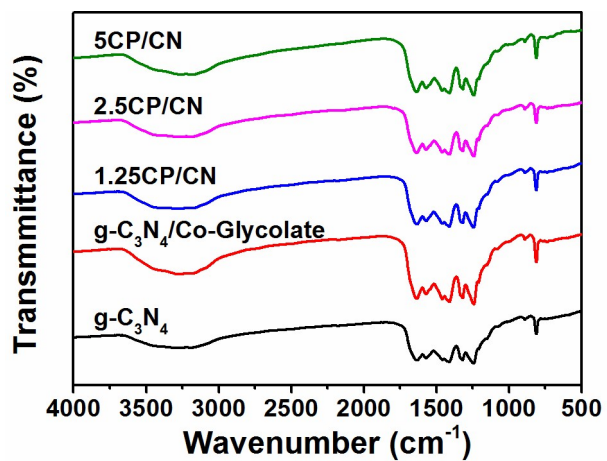

**Fig. S5** FT-IR spectra of the pure  $g\text{-C}_3\text{N}_4$ , Co-Glycolate/ $g\text{-C}_3\text{N}_4$ , CoP/ $g\text{-C}_3\text{N}_4$  composites with variable CoP mass contents (1.25, 2.5, 5 wt%).

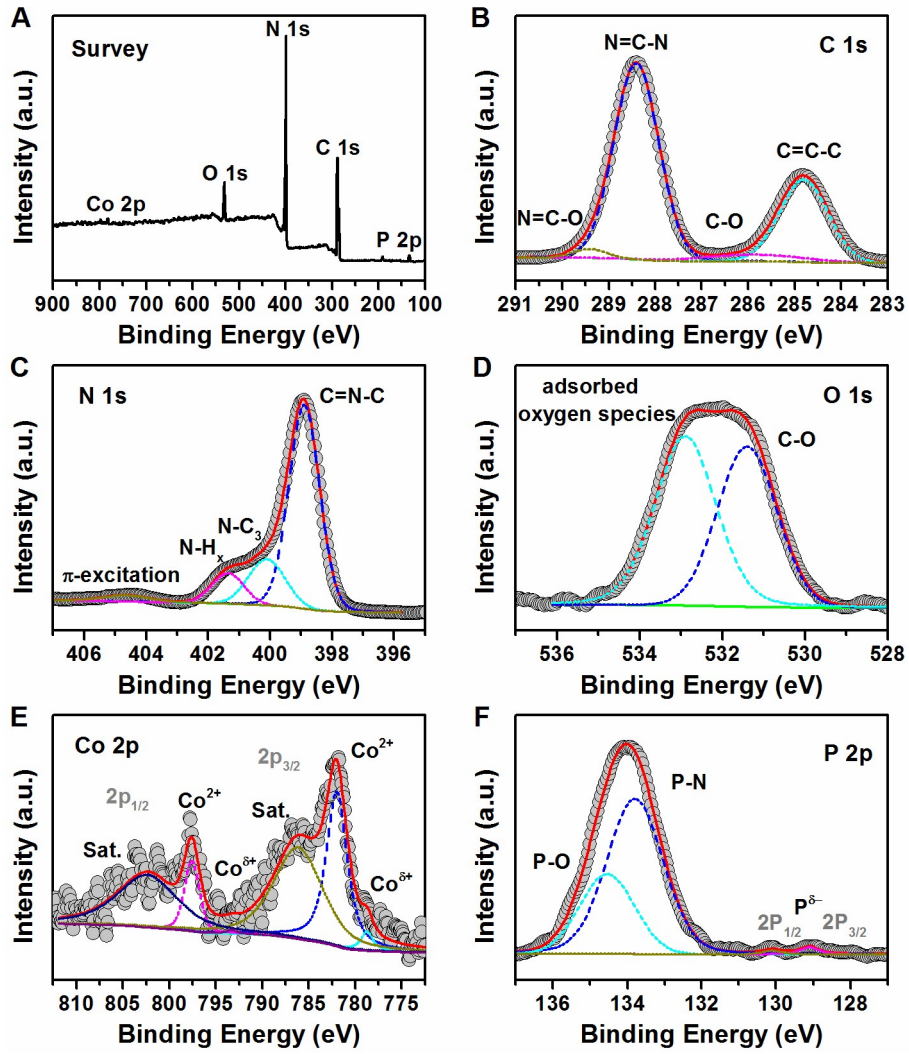

Fig. S6 XPS spectra for 2.5CP/CN sample.

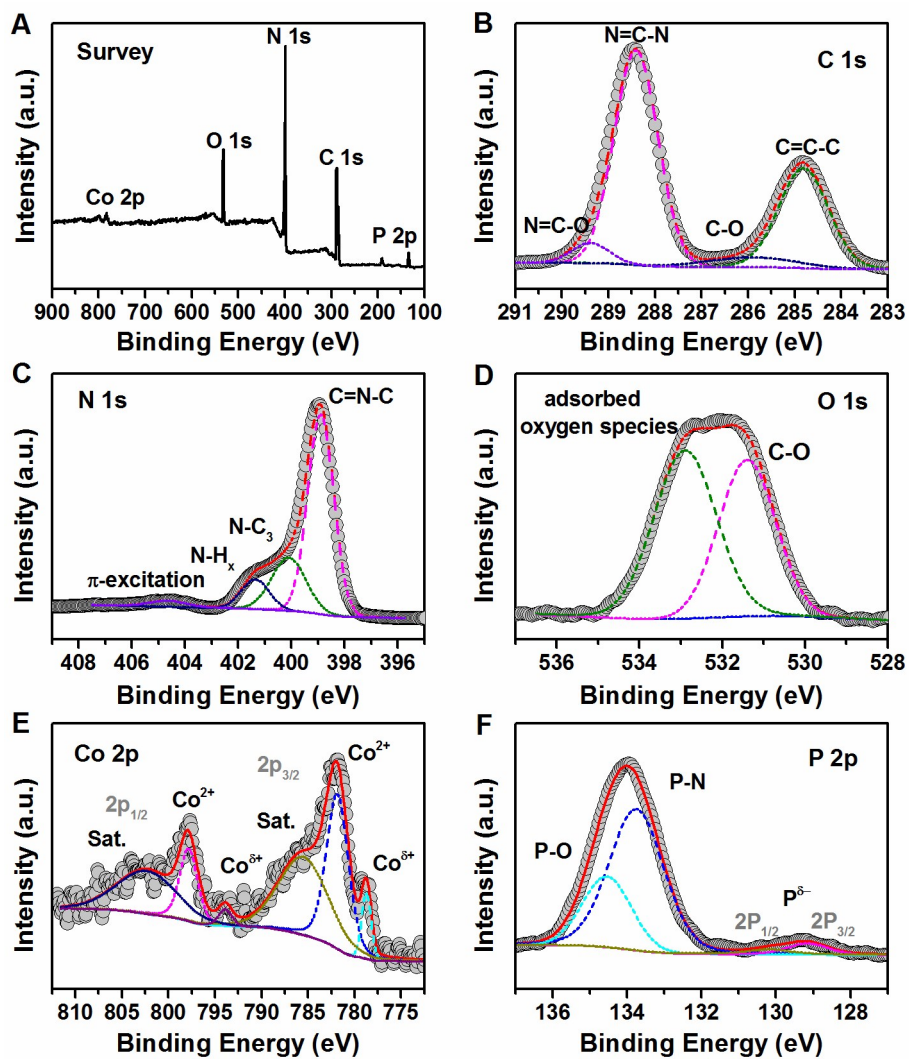

Fig. S7 High resolution XPS results of 7.5CP/CN sample.

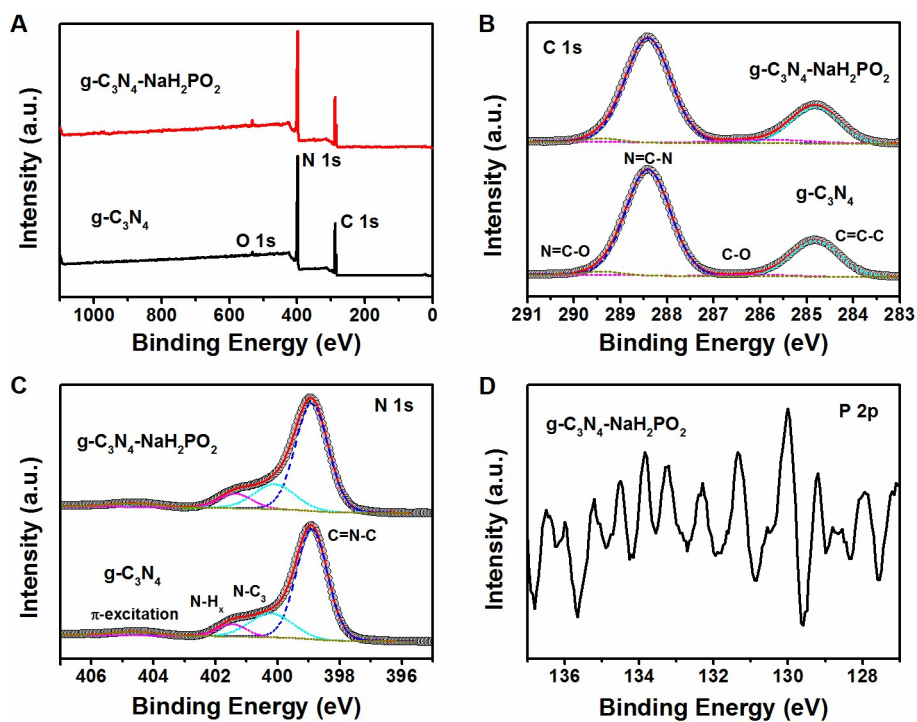

Fig. S8 XPS spectra for pristine  $g\text{-C}_3\text{N}_4$  and  $g\text{-C}_3\text{N}_4$  after heated with  $\text{NaH}_2\text{PO}_2$ .

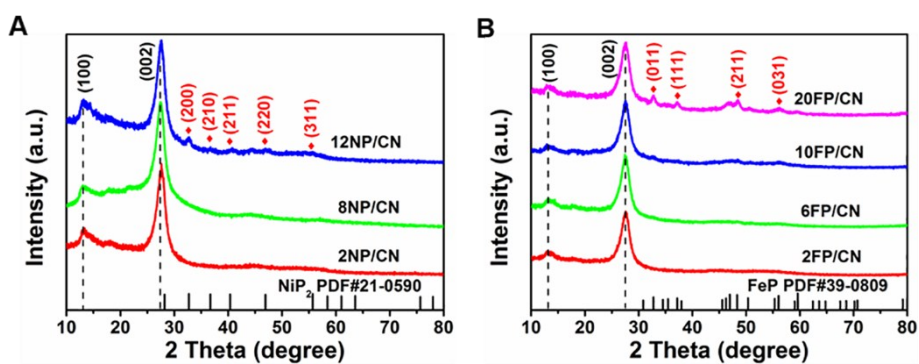

Fig. S9 XRD patterns of (A) the  $\text{NiP}_2/g\text{-C}_3\text{N}_4$  composites with variable  $\text{NiP}_2$  mass contents (2, 8, 12 wt%) and (B) the  $\text{FeP}/g\text{-C}_3\text{N}_4$  composites with variable  $\text{FeP}$  mass contents (2, 6, 10, 20 wt%).



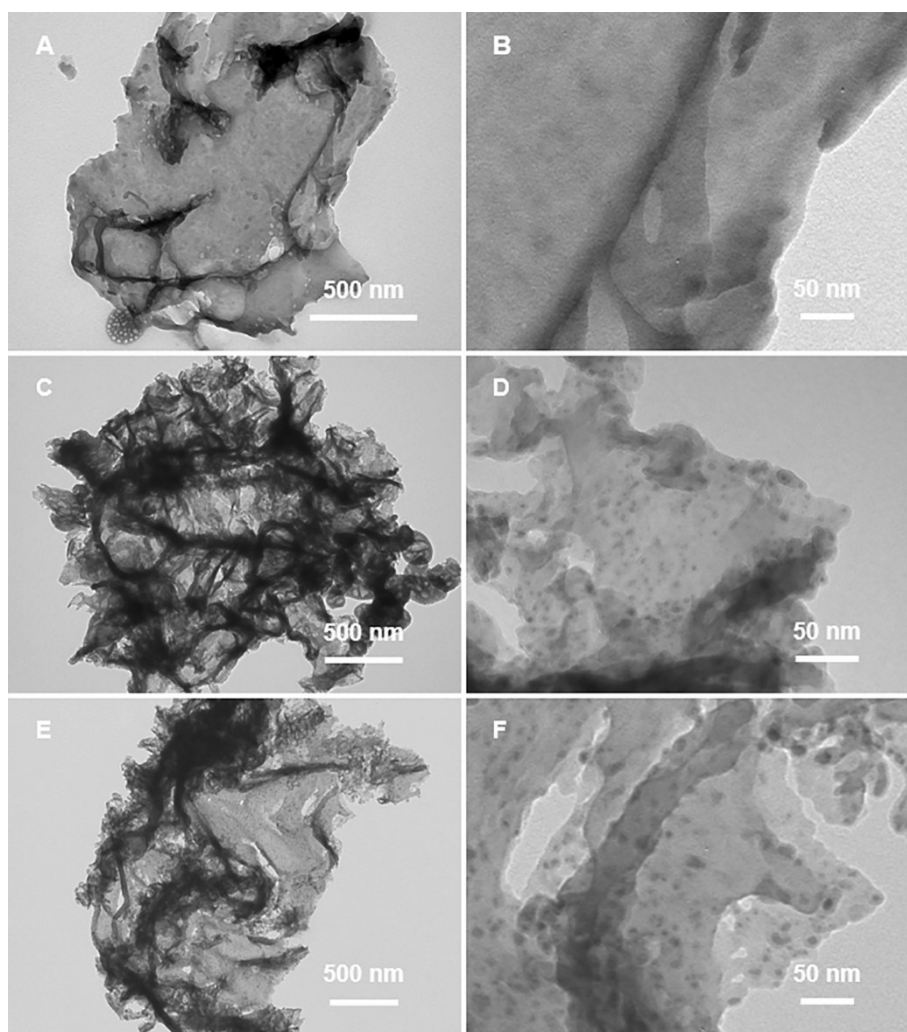

**Fig. S10** Low-magnification and high-magnification TEM images of (A, B) 2 wt% NiP<sub>2</sub>/g-C<sub>3</sub>N<sub>4</sub>, (C, D) 8 wt% NiP<sub>2</sub>/g-C<sub>3</sub>N<sub>4</sub> and (E, F) 12 wt% NiP<sub>2</sub>/g-C<sub>3</sub>N<sub>4</sub>.



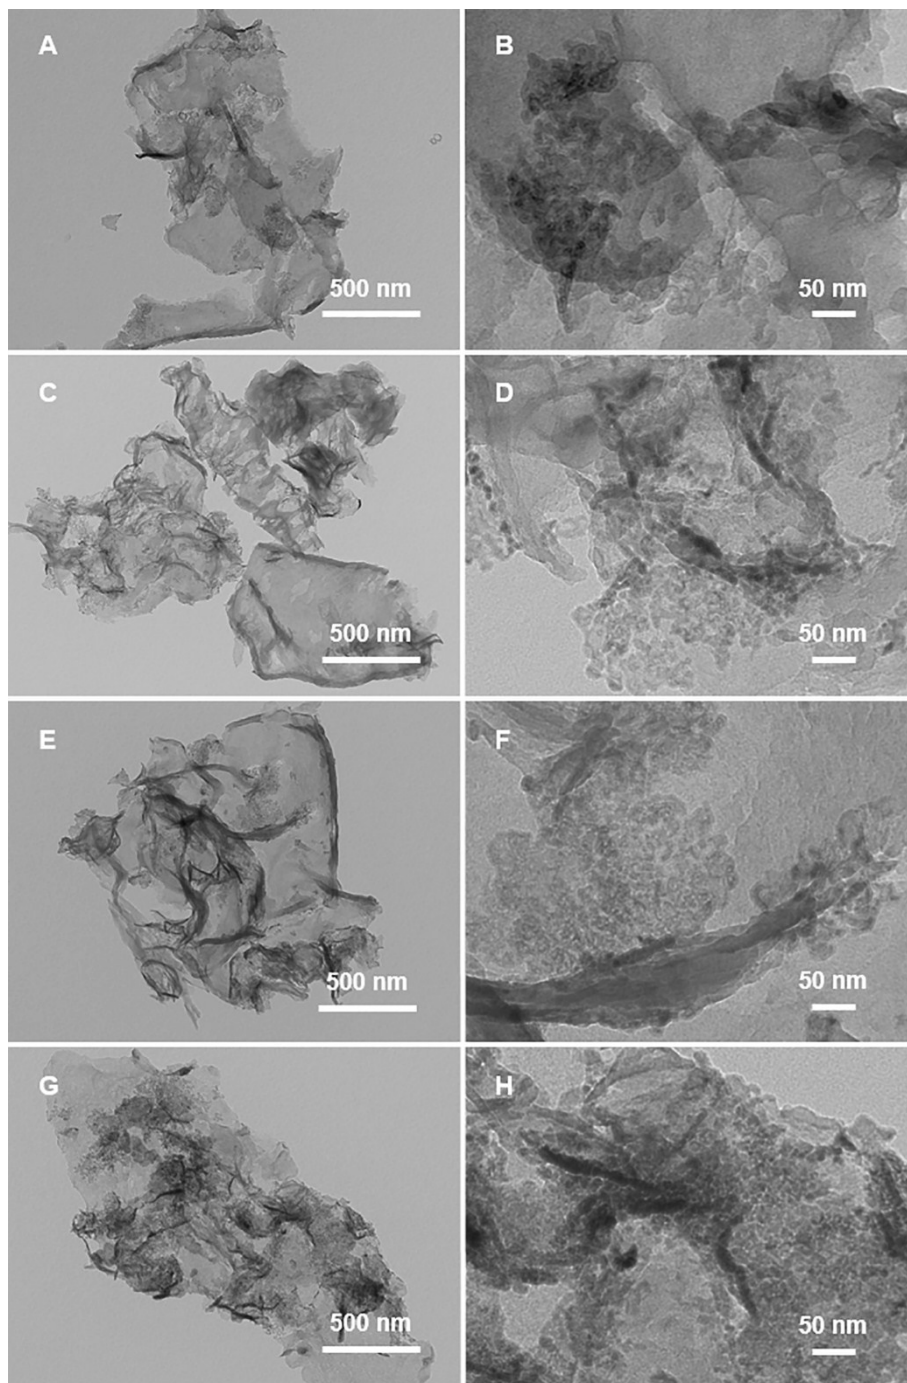

**Fig. S11** Low-magnification and high-magnification TEM images of (A, B) 2 wt% FeP/g-C<sub>3</sub>N<sub>4</sub>, (C, D) 6 wt% FeP/g-C<sub>3</sub>N<sub>4</sub>, (E, F) 10 wt% FeP/g-C<sub>3</sub>N<sub>4</sub> and (G, H) 20 wt% FeP/g-C<sub>3</sub>N<sub>4</sub>.

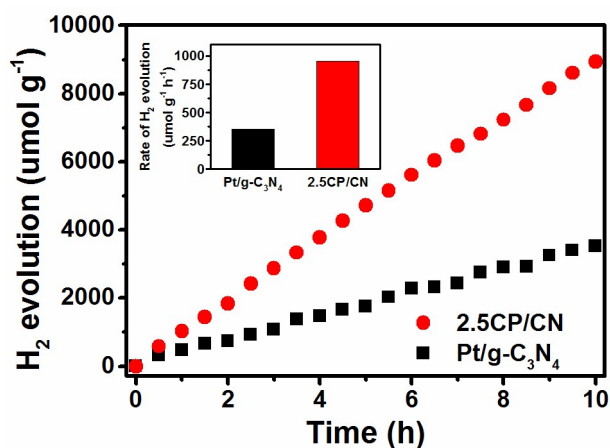

**Fig. S12** Time course of photocatalytic H<sub>2</sub> production for 2.5 wt% Pt/g-C<sub>3</sub>N<sub>4</sub> and 2.5CP/CN samples under visible light irradiation ( $\lambda > 420$  nm) from 300 W Xe lamp using TEOA as the sacrificial agent.

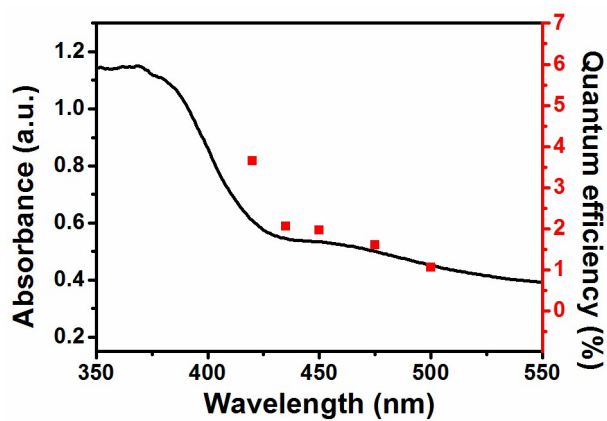

**Fig. S13** The UV-vis diffuse spectrum (left axis) and wavelength-dependent quantum efficiency (right axis) of 2.5CP/CN for H<sub>2</sub> evolution (irradiation by a 300 W Xe lamp using a band-pass filter of full width at half maximum (FWHM) = 15 nm).

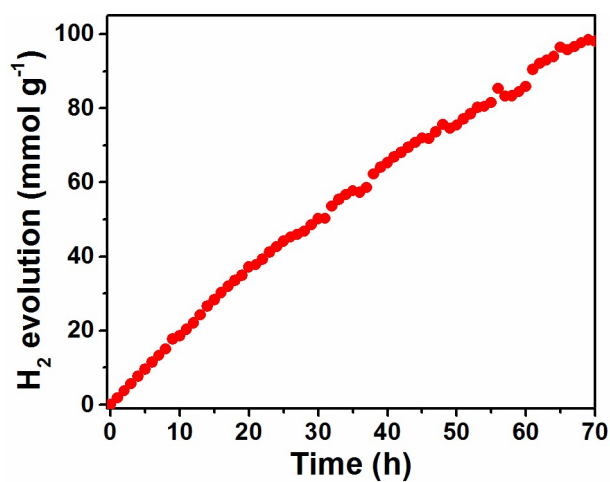

**Fig. S14** Long-term photocatalytic H<sub>2</sub> evolution with 2.5CP/CN sample under simulated solar irradiation ( $\lambda > 300$  nm) from 300 W Xe lamp using TEOA as the sacrificial agent.

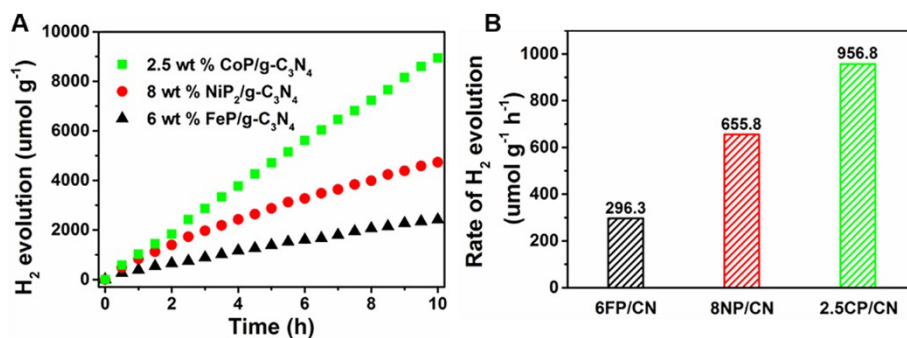

**Fig. S15** (A) Time courses of photocatalytic H<sub>2</sub> evolution and (B) photocatalytic H<sub>2</sub> evolution rates over 2.5 wt% CoP/g-C<sub>3</sub>N<sub>4</sub>/, 8 wt% NiP<sub>2</sub>/g-C<sub>3</sub>N<sub>4</sub> and 6 wt% FeP/g-C<sub>3</sub>N<sub>4</sub> hybrid photocatalysts in 10 vol% triethanolamine (TEOA) aqueous solution under visible light irradiation ( $\lambda > 420$  nm).

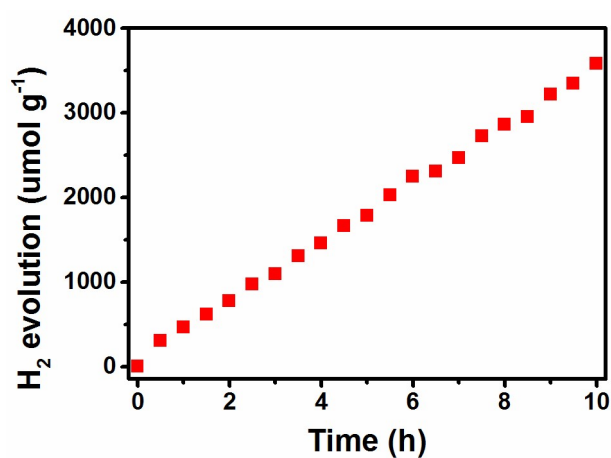

**Fig. S16** Time course of H<sub>2</sub> production for 2.5 wt% Pt/g-C<sub>3</sub>N<sub>4</sub>-NaH<sub>2</sub>PO<sub>2</sub> sample under visible light irradiation ( $\lambda > 420$  nm) from 300 W Xe lamp using TEOA as the sacrificial agent.

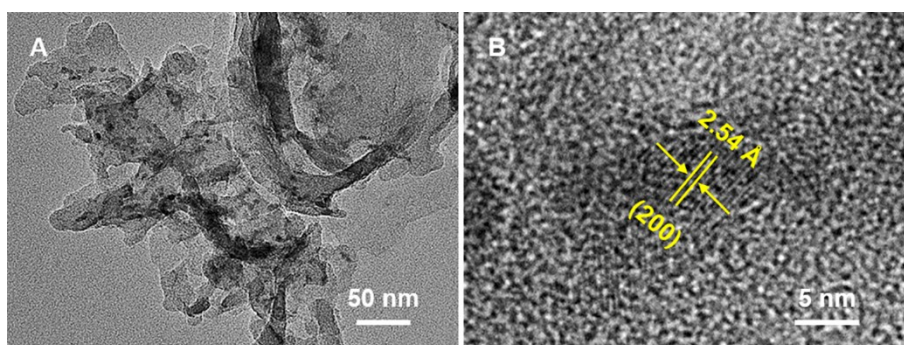

**Fig. S17** TEM images of 2.5CP/CN sample after 70 h of continuous photocatalytic hydrogen production.

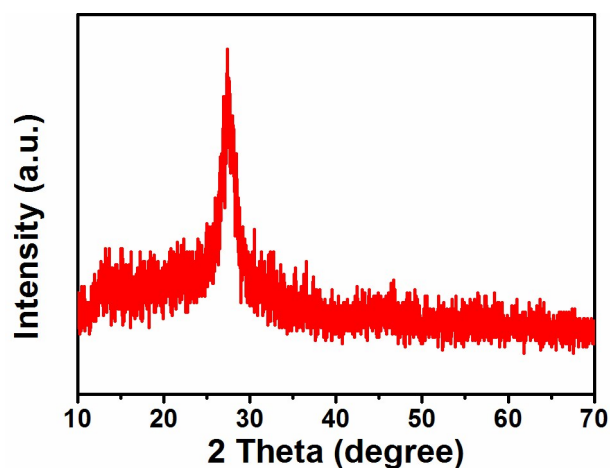

Fig. S18 XRD pattern of 2.5CP/CN sample after 70 h of continuous photocatalytic hydrogen production.

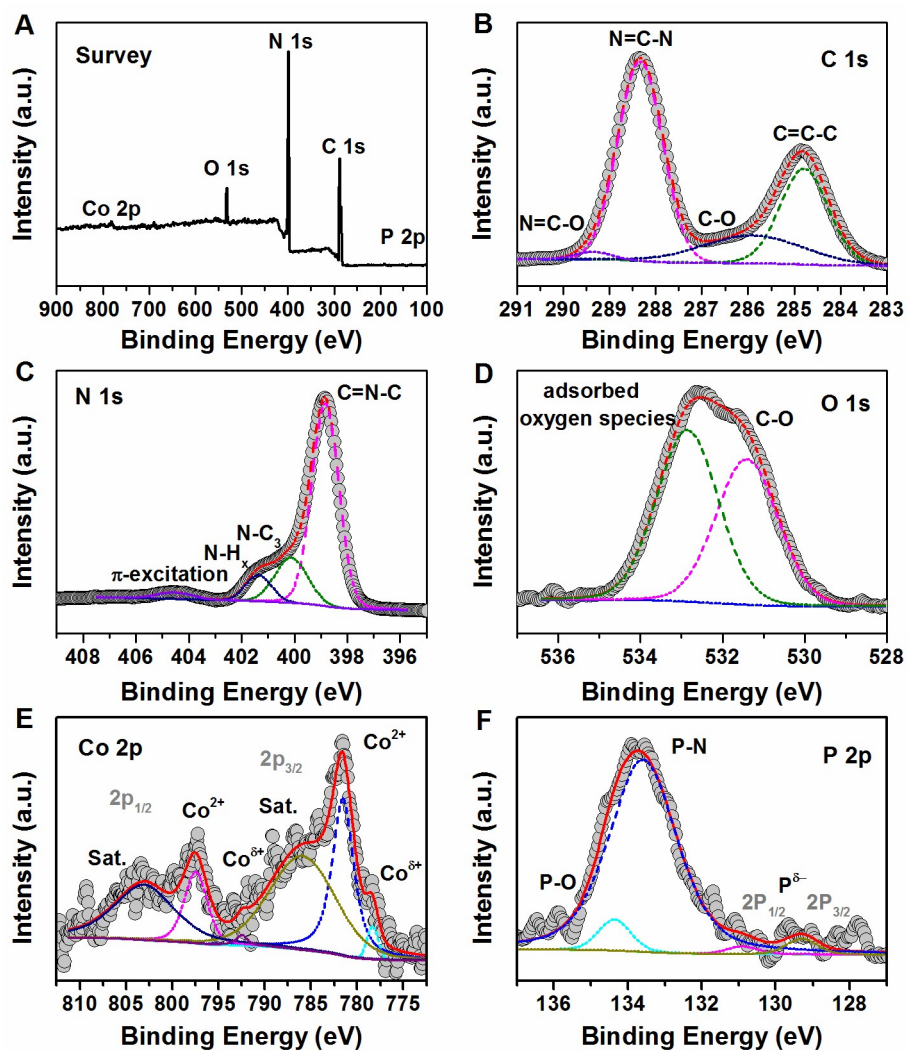

Fig. S19 (A) Co 2p and (B) P 2p XPS survey spectra of 2.5CP/CN sample after 70 h continuous photocatalytic hydrogen production.

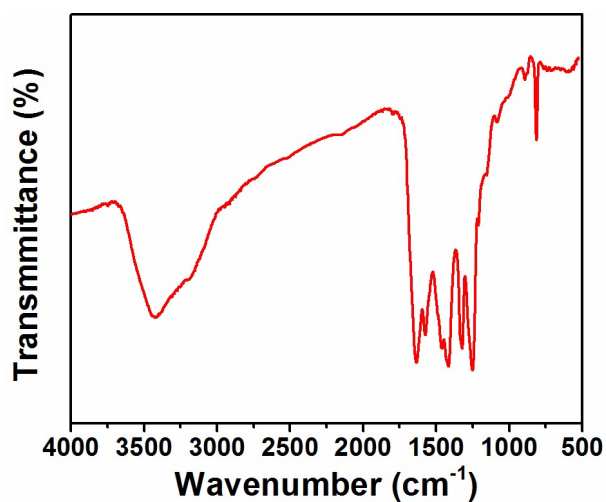

Fig. S20 FT-IR spectra of 2.5CP/CN sample after 70 h of continuous photocatalytic hydrogen production.

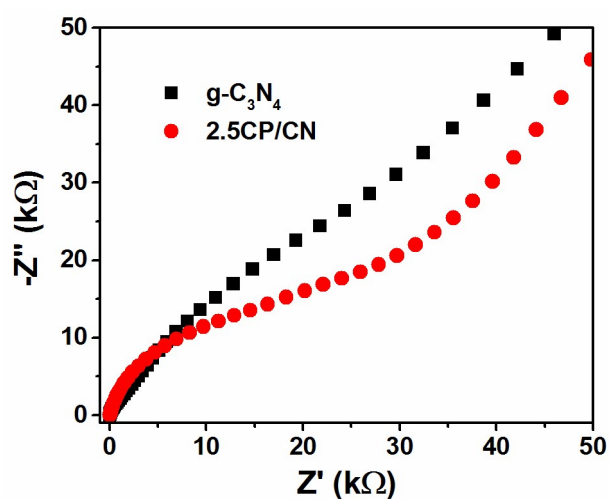

Fig. S21 EIS Nyquist plots of pure  $g\text{-C}_3\text{N}_4$  and 2.5CP/CN samples.

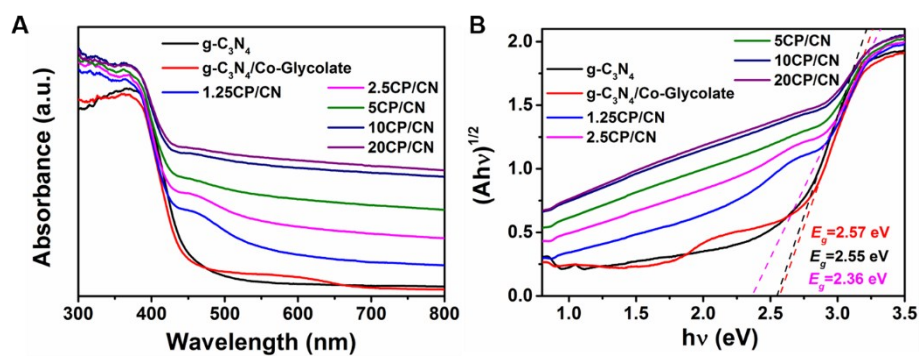

Fig. S22 (A) UV-vis diffuse reflectance spectra and (B) The Tauc plot of the pure  $g\text{-C}_3\text{N}_4$ , Co-Glycolate/ $g\text{-C}_3\text{N}_4$ , CoP/ $g\text{-C}_3\text{N}_4$  composites with variable CoP mass contents (1.25, 2.5, 5, 10, 20 wt%).



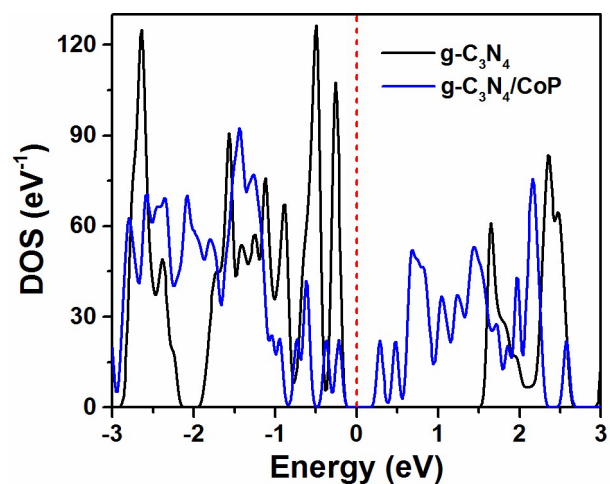

Fig. S23 Total density of states for pure  $g\text{-C}_3\text{N}_4$  (black) and  $\text{CoP}/g\text{-C}_3\text{N}_4$  (blue).

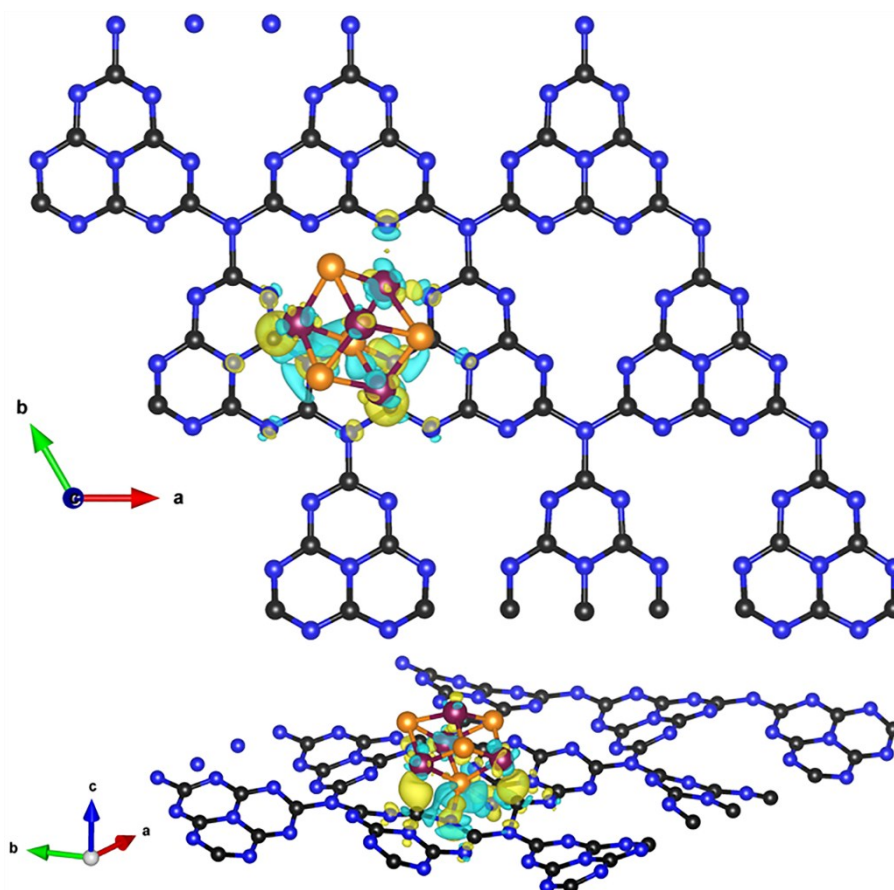

Fig. S24 Charge density difference isosurfaces of  $\text{CoP}/g\text{-C}_3\text{N}_4$ . The cyan region represents charge depletion, and the yellow region represents charge accumulation. The isosurface value is  $0.05 \text{ e}/\text{\AA}^3$ . The blue, black, orange and violet spheres represent N, C, P and Co atoms, respectively.

**Table S1** ICP results of the as-prepared CoP/g-C<sub>3</sub>N<sub>4</sub> samples with variable CoP mass contents (1.25, 2.5, 5, 7.5 and 10 wt%).

| Sample    | Content (wt%) |
|-----------|---------------|
| 1.25CP/CN | 1.17          |
| 2.5CP/CN  | 2.44          |
| 5CP/CN    | 4.16          |
| 7.5CP/CN  | 6.05          |
| 10CP/CN   | 6.48          |

**Table S2** ICP results of the as-prepared NiP<sub>2</sub>/g-C<sub>3</sub>N<sub>4</sub> samples with variable NiP<sub>2</sub> mass contents (6, 8 and 10 wt%).

| Sample  | Content (wt%) |
|---------|---------------|
| 6NP/CN  | 4.44          |
| 8NP/CN  | 6.37          |
| 10NP/CN | 8.05          |

**Table S3** ICP results of the as-prepared FeP/g-C<sub>3</sub>N<sub>4</sub> samples with variable FeP mass contents (2, 6 and 10 wt%).

| Sample  | Content (wt%) |
|---------|---------------|
| 2FP/CN  | 2.52          |
| 6FP/CN  | 6.83          |
| 10FP/CN | 8.87          |

**Table S4** The hydrogen production activity of as-prepared FeP/g-C<sub>3</sub>N<sub>4</sub> and NiP<sub>2</sub>/g-C<sub>3</sub>N<sub>4</sub> samples with variable FeP and NiP<sub>2</sub> mass contents.

| Sample  | H <sub>2</sub> production (umol g <sup>-1</sup> h <sup>-1</sup> ) |
|---------|-------------------------------------------------------------------|
| 6NP/CN  | 480.1                                                             |
| 8NP/CN  | 655.8                                                             |
| 10NP/CN | 580.5                                                             |
| 2FP/CN  | 129.1                                                             |
| 6FP/CN  | 296.3                                                             |
| 10FP/CN | 194.6                                                             |



**Table S5** Comparison of photocatalytic H<sub>2</sub> evolution activities of the non-noble-metal cocatalyst modified g-C<sub>3</sub>N<sub>4</sub> photocatalysts.

| Catalyst                                                         | Synthetic method                                                                                          | Electron donor | Light source    | H <sub>2</sub> production (umol g <sup>-1</sup> h <sup>-1</sup> ) | Ref.            |
|------------------------------------------------------------------|-----------------------------------------------------------------------------------------------------------|----------------|-----------------|-------------------------------------------------------------------|-----------------|
| Ni <sub>2</sub> P/g-C <sub>3</sub> N <sub>4</sub>                | Mixing the Ni salt, NaH <sub>2</sub> PO <sub>2</sub> , g-C <sub>3</sub> N <sub>4</sub> and heating method | TEOA           | ≥ 420 nm        | 644                                                               | 1               |
| CoP/g-C <sub>3</sub> N <sub>4</sub>                              | Grinding method                                                                                           | TEOA           | ≥ 420 nm        | 474.4                                                             | 2               |
| Ni <sub>12</sub> P <sub>5</sub> /g-C <sub>3</sub> N <sub>4</sub> | Solution-phase self-assembly method                                                                       | TEOA           | ≥ 420 nm        | 535.7                                                             | 3               |
| Ni(OH) <sub>2</sub> /g-C <sub>3</sub> N <sub>4</sub>             | Precipitation method                                                                                      | TEOA           | ≥ 400 nm        | 152                                                               | 4               |
| NiS/g-C <sub>3</sub> N <sub>4</sub>                              | Hydrothermal method                                                                                       | TEOA           | ≥ 420 nm        | 482                                                               | 5               |
| <b>CoP/g-C<sub>3</sub>N<sub>4</sub></b>                          | <b>Reflowing-phosphorization method</b>                                                                   | <b>TEOA</b>    | <b>≥ 420 nm</b> | <b>956.8 (3 h)</b><br><b>861.3 (24 h)</b><br><b>783.8 (70 h)</b>  | <b>Our work</b> |

#### References

1. A. Indra, A. Acharjya, P.W. Menezes, C. Merschjann, D. Hollmann, M. Schwarze, M. Aktas, A. Friedrich, S. Lochbrunner, A. Thomas, M. Driess, *Angew. Chem.* 129 (2017) 1675-1679.
2. S.-S. Yi, J.-M. Yan, B.-R. Wulan, S.-J. Li, K.-H. Liu, Q. Jiang, *Appl. Catal. B Environ.* 200 (2017) 477-483.
3. D. Zeng, W.-J. Ong, H. Zheng, M. Wu, Y. Chen, D.-L. Peng, M.-Y. Han, *J. Mater. Chem. A* 5 (2017) 16171-16178.
4. J. Yu, S. Wang, B. Cheng, Z. Lin, F. Huang, *Catal. Sci. Technol.* 3 (2013) 1782-1789.
5. J. Hong, Y. Wang, Y. Wang, W. Zhang, R. Xu, *ChemSusChem* 6 (2013) 2263-2268.
